# Supplementary material for: A De Novo FOXP1 Truncating Mutation in a Patient Originally Diagnosed as C Syndrome
Source: PubMed Central journal article supplement (PMC5766530; doi:10.1038/s41598-017-19109-9), 2018-01-12
Supplement: 41598_2017_19109_MOESM1_ESM.pdf [file 41598_2017_19109_MOESM1_ESM.pdf]

**A *DE NOVO* FOXPI TRUNCATING MUTATION IN A PATIENT ORIGINALLY  
DIAGNOSED AS C SYNDROME**

Roser Urreizti, Sarah Damanti, Carla Esteve, Héctor Franco-Valls, Laura Castilla-Vallmanya, Raul Tonda, Bru Cormand, Llüisa Vilageliu, John M. Opitz, Giovanni Neri, Daniel Grinberg, Susana Balcells

**Supplementary Material.**

**Supplementary Table S1:**

| GENE           | Change | cDNA       | Protein        | Inheritance                             | Disease <sup>1</sup>                                                                             | MIM number                 | PT <sup>2</sup>  | Provean/SIFT/<br>PolyPhen2 | ExAC MAF<br>(homoz.) | Constrained <sup>3</sup>     | Comments                                                                                                                                                                   |
|----------------|--------|------------|----------------|-----------------------------------------|--------------------------------------------------------------------------------------------------|----------------------------|------------------|----------------------------|----------------------|------------------------------|----------------------------------------------------------------------------------------------------------------------------------------------------------------------------|
| <i>SLC17A5</i> | C>T    | c.567G>A   | p.Trp189*      | Patient htz;<br>father htz              | Salla disease<br>Sialic acid storage<br>disorder, infantile                                      | 604369<br>269920           | AR<br>AR         | NA/NA/NA                   | -                    | no                           | Only one putatively pathogenic allele detected in the patient, inherited from an unaffected parent.                                                                        |
| <i>POLH</i>    | .>AA   | c.117insAA | p.Ser40Asnfs*8 | Patient htz;<br>mother htz              | Xeroderma<br>pigmentosum                                                                         | 278750                     | AR               | NA/NA/NA                   | -                    | no                           | Only one putatively pathogenic allele detected in the patient, inherited from an unaffected parent.                                                                        |
| <i>TRPC5</i>   | G/T    | c.279C>A   | p.Ser93Arg     | Patient hemiz;<br>mother htz            | none                                                                                             |                            |                  | N/T/B                      | 0.00001 (0)          | yes<br>(missense<br>and LoF) | rs779715044. Only one putatively pathogenic allele detected in the patient, inherited from an unaffected parent.                                                           |
| <i>MAP4K2</i>  | G>A    | c.439C>T   | p.Gln147*      | Patient htz;<br>father htz              | none                                                                                             |                            |                  | NA/NA/NA                   | 0.000008<br>(0)      | no                           | Only one putatively pathogenic allele detected in the patient, inherited from an unaffected parent.                                                                        |
| <i>DMD</i>     | C>G    | c.2971G>C  | p.Glu991Asn    | Patient hemiz;<br>mother htz            | Becker muscular<br>dystrophy<br>Cardiomyopathy,<br>dilated, 3B<br>Duchenne muscular<br>dystrophy | 300376<br>302045<br>310200 | XLR<br>XL<br>XLR | N/T/D                      | 0.0015 (60)          | yes (LoF)                    | rs72468667: described in hemizyosity in 60 healthy individuals. Inherited from an unaffected parent.                                                                       |
| <i>MAGEL2</i>  | C>T    | c.1894G>A  | p.Ala632Thr    | Patient htz;<br>mother htz              | Schaaf-Yang<br>syndrome<br>(SHFYNG)                                                              | 615547                     | AD               | NA/NA/NA                   | 0.00003 (0)          | Yes (LoF)                    | <i>MAGEL2</i> gene is maternally silenced. The mutation is in the inactive copy of the gene. All mutations previously associated with SHFYNG are truncating.               |
| <i>ASXLI</i>   | A>G    | c.2957A>G  | p.Asn986Ser    | Patient hom;<br>both parents<br>are htz | Bohring-Opitz<br>Syndrome (BOS)                                                                  | 605039                     | AD               | N/T/B                      | 0.0012 (0)           | no                           | rs145132837: present in 153 healthy individuals, no homozygous individuals reported. All mutations previously associated with BOS are <i>de novo</i> truncating mutations. |

HTZ: Heterozygous; Hom: Homozygous; Hemiz: hemizygous, AR: Autosomal Recessive; XLR: X-linked Recessive; XL: X-linked; AD: Autosomal Dominant; NA: Not Available; N: Neutral; T: Tolerated; B: Benign; D: Damaging; LoF: Loss of Function

<sup>1</sup> disease/s associated with mutations in this gene

<sup>2</sup> PT: pattern of inheritance of the associated disease.

<sup>3</sup> Genes "constrained" by evolution according to ExAC database. These genes presented less mutations than expected by chance, suggesting an important function for the gene.

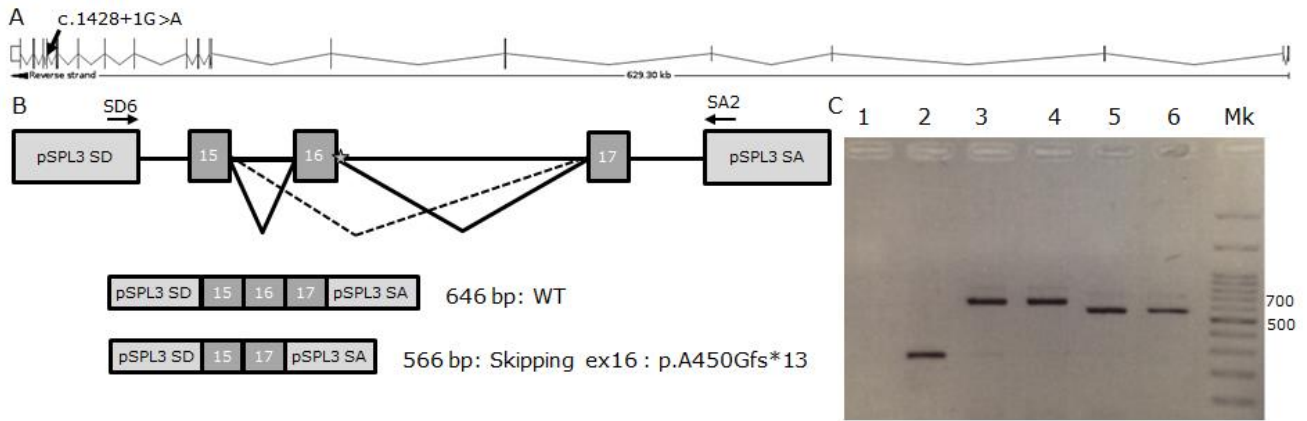

**Supplementary Figure S1.** (A) *FOXP1* gene representation (ENST00000318789.4). The black arrow marks the position of the mutation (at exon 16 splicing donor site). (B) Schematic representation of the pSLP3 minigene construct and putative splicing events. (C) PCR amplification of the (2) empty vector, the vector containing the minigene with the wt allele (3 and 4) and with the c.1428+1G>A mutation (5 and 6). Mk: 100pb molecular weight marker, (1) negative control.
